# Supplementary material for: Adult Stature and Diabetes Complications in Patients With Type 1 Diabetes
Source: Oxford University Press journal article supplement (doi:10.2337/db08-1767), 2009-06-02
Supplement: db08-1767_online_appendix.doc [file db08-1767_online_appendix.doc]

We gratefully acknowledge all physicians and nurses at each FinnDiane Study center across Finland for recruiting patients:

**Etelä-Karjala Central Hospital;** Esko Hussi, Tuula Hotti, Jukka Toivonen, **Kainuu Central Hospital;** Silja Jokelainen, Paula Kemppainen, Anna-Maria Mankinen, Marja Sankari, **Kanta-Häme Central Hospital;** Pirjo Kinnunen, Anja Orvola, Tapani Salonen, Annukka Vähänen, **Keski-Pohjanmaa Central Hospital;** Stefan Anderson, Beatrice Asplund, Ulrika Byskata, Toini Virkkala, **Keski-Suomi Central Hospital;** Terje Forslund, Pirkko Koskiaho, Marianne Laukkanen, Juha Saltevo, **Kuopio University Central Hospital;** Erja Huttunen, Risto Ikäheimo, Pauli Karhapää, Päivi Kiljander, Markku Laakso, Timo Lakka, Leena Moilanen, Leo Niskanen, Ulla Tuovinen , Ilkka Vauhkonen, Erkki Voutilainen; **Kymenlaakso Central Hospital;** Mare Riihelä, Leena Ryysy; **Lappi Central Hospital;** Sirkka Severinkangas, Timo Tulokas, **Länsi-Pohja Central Hospital;** Pirkko Nyländen, Anita Sademies, **Mikkeli Central Hospital; A**nita Gynther, Maarit Salminen, Tuomo Vänttinen, **Pohjois-Karjala Central Hospital;** Laura Hyttinen, Päivi Kekäläinen, Maija Pietarinen, **Päijät-Häme Central Hospital;** Hannu Haapamäki, Antero Helanterä, Satu Hämäläinen, Vesa Ilvesmäki, Hilkka Miettinen, **Satakunta Central Hospital;** Markku Asola, Marjo Pentti, Paavo Pääkkönen, Marja Rautavirta, **Savonlinna Central Hospital;** Tuula Pulli, Päivi Sallinen, Eija Toivanen, Helena Valtonen, Aarne Vartia, **Seinäjoki Central Hospital;** Eeva Korpi-Hyövälti, Terhikki Latvala, Esko Leijala, **Tampere University Central Hospital;** Ilpo Ala-Houhala, Tuula Kuningas, Paula Lampinen, Marita Määttä, Heikki Oksala, Tuija Oksanen, Kristiina Salonen, Hilkka Tauriainen, Sirkku Tulokas, **Turku University Central Hospital;** Kaija Breitholz, Raija Eskola, Kaj Metsärinne, Riikka Neva, Ulla Pietilä, Pirjo Saarinen, Riitta Tuominen, **Vaasa Central Hospital;** Stig Bergkulla, Ulla Hautamäki, Vivi-Ann Myllyniemi, **Åland Central Hospital;** Hans Granlund, Ann-Christin Johnsson, **Iisalmi Hospital;** Eija Toivanen, **Pietarsaari Hospital;** Maj-Len Holmbäck, Bo Isomaa, Leena Sarelin, **Jokilaakso Hospital;** Tuula Laitinen, **Jorvi Hospital;** Suvimarja Aranko, Suvi Ervasti, Ritva Kauppinen-Mäkelin, Arto Kuusisto, Katriina Nikkilä, Leena Pekkonen, **Kivelä Hospital, Helsinki;** Ari Aimolahti, Maarit Kärki, **Koskela Hospital, Helsinki;** Maija Lehtimäki, Nina Uhlenius, **Kuusankoski Hospital;** Esa Kilkki, Liisa Riihelä, **Laakso Hospital, Helsinki;** Taina Meriläinen, Paula Poukka, Tuula Tikkanen, **Lahti City Hospital; A**ulikki Mäkelä, Marjukka Tanner, **Lohja Hospital;** Tuula Granlund, Mikko Saari, Tuula Salonen, Reija Tähtinen, **Lounais-Häme Hospital;** Tarja Kalliomäki, Juha Koskelainen, Riitta Nikkanen, Niilo Savolainen, Vesa Salonen, Hannu Sulonen, **Malmi Hospital, Helsinki;** Helena Lanki, Seija Moilanen, Marju Tilly-Kiesi, **Mänttä Hospital;** Anne-Mirjami Hänninen, Ismo Pirttiniemi, **Oulaskangas Hospital;** Elina Jokelainen, Pirkko-Liisa Jylkkä, Elsi Kaarlela, **Pieksämäki Hospital;** Mari Tamminen, Markku Taskinen, **Pori City Hospital;** Pirjo Merensalo, Kirsi Sävelä, Terttu Viitala, **Porvoo Hospital;** Heidi Johansson, Bjarne Rask, Sirkka Rämö, **Raahe Hospital;** Anne Holma, Matti Honkala, Aino Tuomivaara, Riitta Vainionpää, **Rauma Hospital;** Kaisa Laine, Taru Salminen, **Riihimäki Hospital;** Pirkko Aalto, Marja Lanni, **Salo Hospital;** Jouni Lapinleimu, Pirkko Rautio, Merja Virtanen, **Valkeakoski Hospital;** Terhi Immonen, Seppo Ojanen, Maisa Rautiainen, Eija Valtonen, Hannu Ylönen, **Vammala Hospital;** Irma Isomäki, Leena Mustaniemi, Merja Tapiolinna-Mäkela, **Länsi-Uusimaa Hospital;** Inge-Maj Jousmaa, Jukka Rinne, **Anjalankoski health care center;** Sirpa Koivula, Tarja Uggeldahl; **Espoo health care center:** Espoonlahti: Anita Nikkola, Eila Ritola, Matinkylä: Maria Cederlöf, Tuija Kaitosalmi, Puolarmetsä: Anna-Mari Nousiainen, Samaria: Eija Oukko-Ruponen, Viherlaakso: Anne Lyytinen, Satu Raumavirta-Koivisto, **Heinola health care center;** Päivi Hendunen, Jukka Lagerstam, **Helsinki health care center:** Puistola: Kari Pohjola, Heli Silvennoinen, Suutarila: Anja Kaprio, Birgitta Rantaeskola, Töölö: Jari Haaga, Pirjo Kääriäinen, Anna-Liisa Pietiläinen, **Hyvinkää health care center;** Sisko Klemetti, Teija Nyandoto, Eija Rontu, Susanna Satuli-Autere, **Jyväskylä health care center;** Kirsti Nuorva, Marja Tiihonen, **Järvenpää health care center;** Tuula Kinnunen, Liisa Nikulainen, Tuula Salokangas, **Kerava health care center;** Helene Stuckey, Paula Suominen, **Kirkkonummi health care center;** Anja Lappalainen, Maisa Liimatainen, Jaana Santaholma, **Kotka health care center;** Eeva Pälikkö-Kontinen, Annika Vanhanen, **Kouvola health care center;** Anna Borgman, Erkki Koskinen, **Kuusamo health care center;** Erja Isopoussu, Tapio Kääriäinen, **Lappeenranta health care center, Armila Hospital;** Pirjo Linkola, Irja Pulli, **Loimaa health care center;** Pirjo Eloranta, Arja Mäkelä, **Mikkeli health care center;** Jouko Hänninen, Raili Häkkinen, Helena Levänen, **Nurmijärvi health care center;** Mikko Honkasalo, Marko Miettinen, Päivi Nurminen**, Oulu health care center;** Liisa Hiltunen, Rauni Häkkinen, Sirkka Keinänen-Kiukaanniemi, **Palokka health care center;** Palokka: Leena Welling, Vaajakoski: Kirsti Mäkinen, Päivi Sopanen, **Tampere health care center;** Pekka Alarotu, Liisa Calonius, Seppo Gummerus, Paula Helin, Tarja Kaitala, Helena Kirkkopelto-Jokinen, Eila Kujansuu, Taru Niskanen, Atte Vadén, **Tiirismaa health care center;** Leena Petlin, Liisa Savolainen, **Turku health care center;** Anne Artukka, Irmeli Hämäläinen, Päivi Kokkila, Lea Sorvari, Hille Virtamo, Markku Vähätalo, **Vaasa health care center;** Liisa Gebrehiwet, Kaj Lahti, Sonja Paulaharju, Susanne Salmela, **Vantaa health care center;** Hakunila: Marja Pekkonen, Korso: Jaana Vahtola, Länsimäki: Raila Ahonen, Marja Ivaska-Suomela, Anu Jauhiainen, Martinlaakso: Merja Laine, Tiina Pellonpää, Riitta Puranen, Myyrmäki: Anne Airas, Jukka Laakso, Rekola: Matti Eerola, Eeva Jatkola, Tikkurila: Riitta Lönnblad, Anita Malm, Jari Mäkelä, Elli Rautamo

**Supplement Table 1.** Height (cm) by complication status in men and women in the FinnDiane Study. *P<0.05 (adjusted for year of birth) versusnormoalbuminuria. †P<0.05 (adjusted for year of birth) versusno retinopathy. #P<0.05 (adjusted for year of birth) versus background retinopathy.

|  | Men | Women |
| --- | --- | --- |
| Normoalbuminuria (N=2251) | 178.5±6.8 | 164.7±6.2 |
| Microalbuminuria (N=496) | 176.0±7.3* | 163.1±6.0* |
| Macroalbuminuria (N=576) | 176.0±6.9* | 162.5±6.1* |
| End-stage renal disease (N=272) | 174.1±6.6* | 162.4±6.2* |
| P-value  P-value adjusted for year of birth | <1 x 10-5  <1 x 10-5 | <1 x 10-5  <1 x 10-5 |
|  |  |  |
| No retinopathy (N=1656) | 179.0±6.6 | 165.1±6.4 |
| Background retinopathy (N=794) | 177.6±6.9† | 164.4±6.2 |
| Proliferative retinopathy (N=1400) | 175.3±6.9†# | 162.6±6.0# |
| P-value  P-value adjusted for year of birth | <1 x 10-5  <1 x 10-5 | <1 x 10-5  <1 x 10-5 |
